# Supplementary material for: Morphological plasticity of root growth under mild water stressincreases water use efficiency without reducing yield in maize
Source: Copernicus journal article supplement (doi:10.5194/bg-2017-103), 2017-03-31
Supplement: Supplementary file [file bg-2017-103-AC1-supplement.pdf]

1 **Morphological plasticity of root growth under mild water stress**  
2 **increases water use efficiency without reducing yield in maize**

3

4 Qian Cai<sup>1, 2</sup>, Yulong Zhang<sup>1\*</sup>, Zhanxiang Sun<sup>2\*</sup>, Jiaming Zheng<sup>2</sup>, Wei Bai<sup>2</sup>, [Yue](#)  
5 [Zhang](#)<sup>3</sup>, Yang Liu<sup>2</sup>, Liangshan Feng<sup>2</sup>, Chen Feng<sup>2</sup>, Zhe Zhang<sup>2</sup>, Ning Yang<sup>2</sup>, Jochem  
6 B. Evers<sup>4</sup>, Lizhen Zhang<sup>3</sup>

7

8 <sup>1</sup>College of Land and Environment, Shenyang Agricultural University, Shenyang,  
9 110161, Liaoning, China;

10 <sup>2</sup>Tillage and Cultivation Research Institute, Liaoning Academy of Agricultural  
11 Sciences, Shenyang, 110161, Liaoning, China;

12 <sup>3</sup>College of Resources and Environmental Sciences, China Agricultural University,  
13 Beijing, 100193, China.

14 <sup>4</sup>Wageningen University, Centre for Crop Systems Analysis (CSA),  
15 Droevendaalsesteeg 1, 6708 PB Wageningen, The Netherlands

16

17

18 **First author**

19 Qian Cai, Email: [caiqian2005@163.com](mailto:caiqian2005@163.com)

20 **\*Corresponding author**

21 Yulong Zhang, Email: [ylzsau@163.com](mailto:ylzsau@163.com); Zhanxiang Sun, Email:

22 [sunzhanxiang@sohu.com](mailto:sunzhanxiang@sohu.com)

23 **Abstract**

24 ~~Large yield gap exists in rain-fed maize (Zea mays L.) production in semi-arid~~  
25 ~~regions, mainly caused by frequent droughts halfway the crop growing period due to~~  
26 uneven distribution of rainfall. It is questionable if irrigation systems are  
27 economically required in such a region since total amount of rainfall generally meet  
28 the crop requirement. This study aimed to quantitatively determine the effects of  
29 water stress during jointing to filling stages on root and shoot growth and the  
30 consequences for maize grain yield, above- and below-ground dry matter, water  
31 uptake (WU) and water use efficiency (WUE). Pot experiments were conducted in  
32 2014 and 2015 with a mobile rain shelter. The experiments consisted of three  
33 treatments: (1) no water stress; (2) mild water stress; and (3) severe water stress. ~~The~~  
34 ~~cumulative frequency for no water stress ( above 500 mm) during maize growing~~  
35 ~~season was 69 % from 1965 to 2015, 28 % for mild water stress (350-450 mm) and 4~~  
36 ~~% for severe stress (200-300 mm).~~ Maize yield in mild water stress across two year  
37 was not significantly affected, while severe stress reduced yield by 56 %. Water stress  
38 decreased root biomass slightly but shoot biomass substantially. Mild water stress  
39 decreased root length but increased root diameter, resulting a no effect on root surface  
40 area. ~~Due to the morphological plasticity of root growth and the increase in root/shoot~~  
41 ~~ratio.~~ WU under water stress was decreased, ~~and~~ WUE for maize above-ground dry  
42 matter under mild water stress was increased by 20 % across ~~two~~ years, and 16 % for  
43 grain yield WUE. Our results demonstrates that ~~well irrigation system using~~  
44 ~~underground water~~ in studied region might be not economically ~~and ecologically~~  
45 necessary because the ~~frequent occurred~~ mild water stress ~~did~~ not reduce crop yield  
46 ~~much~~. The study helps to understand crop responses to water stress during critical  
47 water-sensitive period ~~(middle crop growing season)~~ and to mitigate drought risk in

删除的内容: There is a significant potential to increase yield of

删除的内容: , a global major crop,

删除的内容: rain-fed

删除的内容: condition in

删除的内容: since the large yield gap is

删除的内容: therefore

删除的内容: while

删除的内容: all

删除的内容: irrigation s

删除的内容: s

删除的内容: does

48 dry land agriculture.

49 **Keywords:** root diameter; root length; root surface area; root/shoot ratio; yield

50 components; water utilization

## 51 1. Introduction

52 Maize (*Zea mays* L.) as one of the most important crops globally, is a major food  
53 crop in northeast China with an average yield around 5.3 t ha<sup>-1</sup> (Dong et al., 2017).

54 However, the yield gap to the potential of 10.9 t ha<sup>-1</sup> is still large (Liu et al., 2012),  
55 mainly due to frequent summer droughts caused by an uneven distribution of rainfall  
56 during the crop growing season. As global warming causes high expected frequency  
57 of extreme climate events (IPCC, 2007), drought risk for agricultural production in  
58 this region is likely to increase (Song et al., 2014; Yu et al., 2014). Water stress  
59 changes crop responses in morphological and physiological traits (Pampino et al.,  
60 2006). Warming and dry trends under climate change would result deleterious effects  
61 on crop photosynthesis and yield (Richards, 2000).

62 Although the total amount of rainfall can meet the requirement of rain-fed maize  
63 in the semi-arid northeast China, the yearly and seasonal variations often cause a  
64 frequent drought (mostly mild water stress) during summer, resulting a high risk of  
65 yield loss. It can be questioned whether well irrigation systems using underground  
66 water are economically and ecologically required in this situation, since it is not  
67 quantitatively known how the crop yield and water use efficiency would be affected  
68 by drought stress during summer in this region.

69 Suppression of yield by water stress is caused by reducing crop growth (Payero  
70 et al., 2006), canopy height (Traore et al., 2000), leaf area index (NeSmith and Ritchie,  
71 1992) and root growth (Gavloski et al., 1992). Crop shoot development and biomass  
72 accumulation are greatly reduced by soil water deficit at seeding stage (Kang et al.,  
73 2000). Short-duration water deficits during the rapid vegetative growth period causes  
74 around 30% loss in final dry matter (Cakir, 2004). The reduction of maize yield by  
75 water stress is caused by decreases in yield components such as ear density, number

删除的内容: of

删除的内容: lack of irrigation and

删除的内容: is anticipated to

删除的内容: a

删除的内容: er

删除的内容: s

删除的内容: and

删除的内容: s

删除的内容: in

删除的内容: such

删除的内容: size

删除的内容: /or

删除的内容: interestingly

带格式的: 字体: 12 磅,  
字体颜色: 黑色

删除的内容: which is

删除的内容: increased

删除的内容: ac

删除的内容: assimilate

删除的内容: this

删除的内容: y

76 | of kernels per ear and kernel weight (Ge et al., 2012), especially during or before  
77 | maize silk and pollination period (Claassen and Shaw, 1970). The accumulative  
78 | biomass and harvest index (the ratio of grain yield over total aboveground dry matter)  
79 | are decreased under water stress during anthesis (Traore et al., 2000).

80 | Water use efficiency (WUE, expressed in kg yield obtained per m<sup>3</sup> of water) is  
81 | notably reduced by severe water stress especially at vegetative and reproductive  
82 | stages. Interestingly a moderate water stress at V16 (with 16 fully expanded leaves)  
83 | and R1 (silking) stages in maize increased WUE (Ge et al., 2012) because it did not  
84 | significantly affected the ecophysiological characteristics during vegetative stages.  
85 | The irrigation deficits before the maize tasseling stage are often used for improving  
86 | WUE in regions with serious water scarcity, e.g. North China Plain (Qiu et al., 2008;  
87 | Zhang et al., 2017). For example, in winter wheat WUE was increased continuously  
88 | from 1987 to 2015 especially under water stress condition that was obtained from a  
89 | increased harvest index and the reduced soil evaporation (Zhang et al., 2017). Under  
90 | water stress, plant photosynthesis and transpiration decreases due to a decrease in  
91 | stomata conductance (Killi et al., 2017) induced by increasing concentration of  
92 | abscisic acid (ABA) in plant (Beis and Patakas, 2015). However, limited knowledge  
93 | exists on how much the partitioning between shoot and root in maize is affected by  
94 | water stress during middle and late growing stages, and if the root growth and  
95 | morphology regulated by water stress could improve maize yielding and water use  
96 | efficiency.

97 | Since field water stress experiments were difficult to carry out in rain-fed  
98 | agriculture, a large mobile rain shelter was often used in studies to control water stress  
99 | (NeSmith and Ritchie 1992). The objective of this study was to quantify maize shoot  
100 | and root growth, grain yield and WUE under different water stresses during middle

101 crop growing season obtained from a well-controlled mobile rain shelter, to  
102 understand the crop response to water stress during critical water-sensitive period.

## 104 2. Materials and methods

### 105 2.1. Experimental design

106 The experiments were conducted at Shenyang (41°48'N, 123°23'E), Liaoning  
107 province, northeast China in 2014 and 2015. The experimental site is 45 m above sea  
108 level. On average from 1965 to 2015, annual potential evaporation is 1445 mm, total  
109 precipitation is 720 mm, and mean air temperature is 8 °C. The length of the frost-free  
110 period is 150-170 days. Average relative humidity is 63 %. Annual mean wind speed  
111 is 3.1 m s<sup>-1</sup>. The climate is a typical continental monsoon climate with four distinct  
112 seasons, characterized as a hot summer and cold winter. The annual mean air  
113 temperature was 9.5 °C in 2014 and 9.1 °C in 2015. The mean air temperature during  
114 crop growing season (May to September) was 20.2 °C in 2014 and 19.4 °C in 2015  
115 (Fig. 1).

116 Maize plants were grown in pots in three treatments: (1) no water stress; (2) mild  
117 water stress and (3) severe water stress (Table 1). The levels of water stress were  
118 based on historical rainfall frequency analysis. The water supply was controlled by a  
119 mobile rain shelter with steel frame and transparent PVC cover. The mobile rain  
120 shelter is built on a mechanical movement track equipping with a electricity motor to  
121 move the shelter by a remote control. The shelter was moved away from the  
122 experimental plots in no rain days and covered before a rain came, therefore the effect  
123 of shelter on incoming radiation could be ignored. The mobile rain shelter is 9 m in  
124 width, 30 m in length and 4.5 m in height. The top and both sides of the shelter have  
125 PVC transparent boards to prevent outside rainfall. There is a water gutter at out side

删除的内容: in

删除的内容: A

删除的内容: average

删除的内容: Total rainfall during crop growing season (May to September) was 295 mm in 2014 and 436 mm in 2015.

删除的内容: was

126 of movement track to drain the rain water. Therefore the rain water intrusion can be  
127 avoided. Water treatments began from maize jointing (V6, with 6 fully expended  
128 leaves) to filling stages (R3, milk) (Abendroth et al., 2011). Water treatments were  
129 conducted by supplying irrigations once per 5 days before starting water treatments  
130 with same amount for all pots, and once per 3 days during the period of water  
131 treatments. The detail amount of water supplied to each treatment was listed in Table  
132 1. The experiments entailed a completely randomized block design with three  
133 replicates. Each treatment consisted of 12 pots (one plant per pot) and divided into 3  
134 replicates (4 pots each). At each sampling time (totally sampling 4 times), one pot was  
135 used.

删除的内容: Supplement w

删除的内容:

删除的内容: as

删除的内容: given

136 Each pot was 40 cm in diameter and 50 cm in height, filled with 40 kg naturally  
137 dried soil with a bulk density of  $1.31 \text{ g cm}^{-3}$ . Large size of pots in the experiments  
138 effectively avoided space effect of growing good maize. The soil was sandy loam  
139 with a pH of 6.15, total N of  $1.46 \text{ g kg}^{-1}$ , total of P  $0.46 \text{ g kg}^{-1}$  and total K of  $12.96 \text{ g}$   
140  $\text{kg}^{-1}$ . 46.5 g compound fertilizer (N 15 %,  $\text{P}_2\text{O}_5$  15 % and  $\text{K}_2\text{O}$  15 %) and 15.5 g  
141 diammonium phosphate (N 18 % and  $\text{P}_2\text{O}_5$  46 %) were applied to each pot before  
142 sowing. There was no other fertilizer applied during maize growing season. Maize  
143 cultivar used in both years was Liaodan 565, a locally common used drought-resistant  
144 cultivar. One plant was grown in each pot. Maize was sown on 13 May and harvested  
145 on 30 Sept in both 2014 and 2015.

删除的内容: -

删除的内容: -

146

## 147 2.2 Dry matter and grain yield measurements

148 To determine maize dry matter, four plants were harvested on 49 (V6, jointing),  
149 77 (VT, tasseling), 113 (R3, milk) and 141 (R5, dent) days after sowing (DAS) in  
150 2014, and one sampling was done on 132 DAS in 2015. The samples were separated

删除的内容: only

151 into root and shoot, and dried in an oven at 80 °C for 48 hours until reaching a  
152 constant weight. The shoot/root ratio was calculated using dry matters measured.

153 Grain yield was measured by harvesting all cobs in a pot in maize harvesting  
154 time. The grain was sundried with a water content of 15%. Yield components i.e. ear  
155 (cob) numbers per plant, kernel numbers per ear and thousand kernel weight were  
156 measured for all plots.

删除的内容: was

删除的内容: each plant

### 158 2.3 Root measurements

159 Root growth and morphological traits (root length, diameter and surface area)  
160 were measured four times during crop growing season on 49 , 77, 113, 141 DAS, in  
161 2014. The whole roots were collected per pot at the time of dry matter measurements.  
162 Root samples were carefully washed with tap water to remove impurities. The cleaned  
163 roots were placed on a glass plate of a root system scanner. Scanned root images were  
164 analyzed by a plant root image analyzer WinRHIZO PRO 2009 (Regent Instruments  
165 Inc., Canada) to quantify total root length (m), diameter (mm) and surface area (m<sup>2</sup>)  
166 per plant (pot).

删除的内容: only

### 168 2.4 Measuring soil moisture content, water uptake and water use efficiency

169 Soil moisture contents were measured by a soil auger at sowing and harvesting  
170 times for each plot (3 replicates per treatment). Soil cores were taken from the middle  
171 of a pot for each 10 cm layer. After measuring fresh soil weight, soil samples were  
172 dried in an oven at 105 °C for around 48 hours until a constant weight was reached.  
173 The gravimetric soil moisture contents (% , g g<sup>-1</sup>) measured by soil auger were  
174 calculated into volumetric soil moisture content (% , m<sup>3</sup> m<sup>-3</sup>) by multiplying with soil  
175 bulk density.



176 Water uptake (WU) of maize was calculated using a simplified soil water balance  
177 equation (Kang et al., 2002). Because the experiments were sheltered, rainfall,  
178 drainage and capillary rise of water did not occur in this situation and therefore were  
179 not taken into account in the calculation of WU:

$$180 \quad WU = I + \Delta S \quad (1)$$

181 where WU (mm) is crop water uptake (mm) during whole crop growing season, I is  
182 the amount of water supplied to each pot (mm).  $\Delta S$  is the changes of soil water  
183 amount between sowing to harvesting dates.

184 Water use efficiency (WUE) was calculated by measured final yield or  
185 above-ground dry matter and total WU during crop growing season (Zhang et al.,  
186 2007).

$$187 \quad WUE = Y / WU \quad (2)$$

188 where WUE ( $\text{g m}^{-2} \text{mm}^{-1}$  or  $\text{kg m}^{-3}$ ) is water use efficiency expressed in gain yield  
189  $WUE_Y$  or dry matter  $WUE_{DM}$ . Y ( $\text{g m}^{-2}$ ) is grain yield or dry matter. WU (mm) is total  
190 water uptake during maize growing season.

191

## 192 **2.5. Statistical analysis**

193 Analysis of variance on yield, WU, WUE, and dry matter for shoot and root were  
194 performed using General Linear Model of SPSS 20 (SPSS Inc., Chicago, USA). The  
195 differences between means were evaluated through LSD multiple comparison tests at  
196 a significant level of 0.05.

197

## 198 **3. Results**

### 199 **3.1 Variation and frequency distribution of rainfall**

200 The average rainfall during maize growing season (May to September) at

删除的内容: pot

删除的内容: (shoot)

201 experimental site from 1965 to 2015 was 531 mm with a standard deviation of 134  
202 mm (Fig. 2 a). The cumulative frequency of rainfall above 500 mm was 69 % during  
203 past 51 years. The frequency with mild drought stress (350-450 mm) was 28 % and it  
204 with severe drought stress (200-300 mm) was 4 % (Fig. 2 b), indicating that the maize  
205 growing in this climate mainly suffered mild water stress.

### 206 — 207 **3.2 Yield and yield components**

208 Maize yield under mild water stress across two year was not significantly  
209 different with no stress control, while that in severe stress was 56 % lower (Table 2).  
210 The decrease of maize yield in severe water treatments was due to the decreases in ear  
211 number, kernel number and harvest index (HI). However, water stress did not affect  
212 kernel weight, while other yield components were decreased. Year effect was only  
213 significant for HI, which was likely caused by the variation in air temperature: the  
214 cooler weather in 2015 during maize growing season decreased HI comparing with a  
215 warmer year in 2014. There were no interactions between year and treatment.

### 216 217 **3.3 Above- and below-ground dry matters**

218 Mild water stress did not reduce root dry matter (Fig. 3 a, b), but greatly reduced  
219 shoot dry matter, especially at grain filling stage (113 DAS) (Fig. 3 c, d). The severe  
220 water stress decreased both root and shoot dry matter compared with no stress control,  
221 but the magnitude of the decrease in shoot was much larger than in root. At maize  
222 tasseling stage (77 DAS), as roots generally reached their maximum size, root dry  
223 matter under severe water stress was much lower than mild and no water stress  
224 treatments. However, it became less different later in the season, which indicated a  
225 strong complementarily growth of root system under water stress. Due to the different

删除的内容: 1

删除的内容: in

删除的内容: significant

删除的内容: 2

删除的内容: 2

删除的内容: 2

删除的内容: VT

删除的内容: during

226 responses of shoot and root to water stress, the root/shoot ratios under water stress  
227 were increased (Fig. 3 e, f), especially during crop rapid growing period (77 to 113  
228 DAS).

删除的内容: 2

### 229 230 3.4 Root length, diameter and total surface area, affected by water stresses

删除的内容: 3

删除的内容: per pot

231 Root length per plant was much lower under severe water stress, especially at  
232 tasseling stage (77 DAS). Mild water stress during maize middle growing season also  
233 decreased root length, but the difference with no stress control was much smaller than  
234 severe stress (Fig. 4 a). Root diameters under both mild and severe water stress  
235 treatments were much higher than under no stress control (Fig. 4 b), especially at late  
236 growing season. Total root surface area was less changed (Fig. 4 c), especially during  
237 maize reproductive growth period (113 DAS).

删除的内容: VT

删除的内容: 3

删除的内容: was

删除的内容: comparing with

删除的内容: 3

删除的内容: The decrease in root length under water stress was partially compensated by the increase in root diameter.

删除的内容: This resulted in a small change in t

### 239 3.5 Water uptake and use efficiency

删除的内容: 3

240 Total water uptakes (WU) under water stress treatments were lower than under  
241 no stress control (Fig. 5). Water use efficiency for maize above-ground dry matter  
242 (WUE<sub>DM</sub>) under water stresses was increased 30.3 % comparing with no stress control,  
243 across all years and treatments (Fig. 5 b). The WUE<sub>DM</sub> in severe water stress was the  
244 highest. However, WUE for grain yield under severe water stress was not significantly  
245 different with that in the control, while that in mild water stress increased 15.7 %  
246 across two years (Fig. 5 c). The difference between WUE in dry matter and grain  
247 yield was due to a decrease in HI under severe water stress (Table 2).

删除的内容: 4

删除的内容: 4

删除的内容: 4

删除的内容: in

删除的内容: showed a

删除的内容: (

删除的内容: )

删除的内容: 4

删除的内容: significant

## 249 4. Discussion and conclusions

250 Mild water stress during the middle growing period did not significantly reduce

删除的内容: suppress

251 maize grain yield. It is different with previous report that maize yield is much more  
252 affected by water stress during flowering stage than other stages (Doorenbos et al.,  
253 1979). Our result differed with a previous study, which showed mild water stress  
254 seriously reduced crop production (Kang et al., 2000). This is likely due to our choice  
255 of a drought-resistant variety (Zhengdan 565) and the difference in ecological zones.  
256 Genotype-dependent relationships between yield and crop growth rate would be  
257 stronger under water stress than under no stress condition (Lake and Sadras, 2016).

删除的内容: , probably due to the ecological conditions and drought-sensitivity of cultivars

258 Mild water stress during middle crop growing period can maintain maize yield  
259 but substantially reduces the water consumption at the same time in our study. Thus,  
260 the water use efficiency was increased (Liu et al., 2016). Mild water stress reduced  
261 total water uptake, resulting a 20 % higher WUE in dry matter, and a 16% higher  
262 WUE in yield. The increase in WUE under mild water stress was from the responses  
263 of shoot and root growth to water stress, as an increase in root/shoot ratio. The water  
264 stress reduced root length growth, however, this reduction was compensated by an  
265 increase in root diameter. However, the maintenance of crop growth under water  
266 stress was limited by the severity of the stress. Under severe water stress, maize  
267 growth fails to be compensated by plant plasticity.

删除的内容: production

删除的内容: partially

删除的内容: different

删除的内容: resulting in

删除的内容: before flowering

删除的内容:

删除的内容: for

删除的内容: later

删除的内容: complementarily lateral root growth

268 Severe water stress greatly reduced both shoot and root biomass. Large decreases  
269 in shoot growth, i.e. less biomass and leaf area, reduces the light interception and  
270 transpiration (Monteith, 1981). Under mild water stress during vegetative and  
271 tasselling stages, the shoot growth was not significantly reduced in this study but in  
272 previous report, e.g. plant height, leaf area development (Cakir, 2004). Mild soil water  
273 deficit may also reduce water loss from plants through physiological regulation  
274 (Davies and Zhang, 1991). A moderate soil drying at the vegetative stage encourages  
275 root growth and distributing in deep soil (Jupp and Newman, 1987; Zhang and Davies,

删除的内容: , which was due to a large decrease in water uptake

删除的内容: Canopy transpiration is largely determined by net radiation absorption by the leaves in the canopy (Monteith, 1981).

删除的内容: .

删除的内容:

删除的内容: and

删除的内容: , however, m

276 1989), which is consistent with our findings. Large root system with deep distribution  
277 is beneficial for water-limited agriculture (McIntyre et al., 1995). These mechanisms  
278 explained why maize yield under mild water stress was not decreased in our study.

279 We found an increase in root diameter under water stresses, although root length  
280 was decreased. This result indicated that the lateral roots under water stress were  
281 probably less than under no water stress. That may limit water absorption since the  
282 lateral roots is younger and more active in uptake function (Lynch, 1995). Average  
283 root diameters in all treatments decreased from 77 to 113 DAS, which was caused by  
284 highly emerged lateral roots after the main root system reached its maximum (VT  
285 stage). The higher average root diameter in water stress treatments than in the control  
286 at 141 DAS was probably due to a fast senescence of late developed lateral roots  
287 under water stress.

288 Our results on root morphological plasticity affected by mild water deficit  
289 provided another evidence for enhancing WUE and maintaining yielding. However,  
290 the mechanism that determines crop response to water stress may also involve other  
291 processes, e.g. intercellular CO<sub>2</sub>, stomatal conductance, photosynthetic rate, oxidative  
292 stress, sugar signaling, membrane stability and root chemical signals (Xue et al., 2006;  
293 Dodd, 2009). The relationship between carbon assimilation and water stress have  
294 been widely explored to understand the physiological mechanism for improving WUE  
295 (Ennahli and Earl, 2005; Xue et al., 2006; Zhang et al., 2013). The abscisic acid  
296 (ABA)-based drought stress chemical signals regulates crop vegetative and  
297 reproductive development and contributes to crop drought adaptation (Killi et al.,  
298 2017). Increased concentration of ABA in the root induced by soil drying may  
299 maintain root growth and increase root hydraulic conductivity, thus increases crop  
300 water uptake and thereby postpone the development of water deficit in the shoot (Liu

删除的内容: by water stress

删除的内容: by a mild water deficit.

删除的内容: loss in relation to the assimilates between reproductive and vegetative organs responding to soil water availability

删除的内容: of

删除的内容: under moderate water stress

删除的内容: Under water limitation, photosynthesis and transpiration rates are in a permanent tradeoff regulating by stomata conductance.

删除的内容: s

301 | et al., 2005). The increase of ABA can also induce stomatal closure and reduces crop  
302 | transpiration (Haworth et al. 2016), net photosynthesis and crop growth (Killi et al.,  
303 | 2017).

删除的内容: Mild water stress during middle crop growing period could potentially maintain maize yield and substantially reduced the water consumption at the same time. Thus, the water use efficiency was increased by water deficit (Liu et al., 2016). However, the maintenance of crop growth under water stress was limited by the severity of the stress. Under severe water stress, maize growth failed to be compensated by structural and functional plasticity in plant growth. Our result differed from a previous study, which showed mild water stress also seriously affected crop production (Kang et al., 2000). This is likely due to our choice for a drought-resistant variety (Zhengdan 565) and the difference in ecological zones. Genotype-dependent relationships between yield and crop growth rate would be stronger under water stress than under no stress condition (Lake and Sadras, 2016).

删除的内容: would

304 | The maize yield in 2015 was much lower than in 2014 independent of water  
305 | stress. That might be caused by a higher maximum air temperature in 2015 (32.0 °C)  
306 | than in 2014 (29.1 °C) during flowering period. High air temperature would reduce  
307 | maize pollination (Muller and Rieu, 2016) and directly affected yield formation and  
308 | HI.

309 | This study clearly demonstrates that the maize yield under mild water stress  
310 | during summer does not decrease but the water use efficiency increases due to  
311 | changes in root and shoot growth. A higher root/shoot ratio under mild water stress  
312 | allows plant efficiently use limited soil water. In studied region (Liaoning province),  
313 | maize mainly grows in rain-fed condition (2.4 million ha), covering 73 % of total area  
314 | for grain crops. To reduce the possible effect of drought on maize production, the  
315 | wells system piping underground water to irrigate crop is planned recently. The wells  
316 | need to be 60 to 70 m deep with an average cost of 12,000 Yuan for each. Each well  
317 | can only irrigate 9 to 10 ha of maize. According to our results, only severe water  
318 | stress significantly reduces maize yield (up to 50%), which occurs less than 5 %  
319 | during 1965 to 2015. Mild water stress occurs much frequently (28% of years),  
320 | however, it does not affect maize yield significantly. Our study suggested that the well  
321 | system in this region might not be economically and ecologically necessary. Other  
322 | agronomy practices such as intercropping maize with crops requiring less water (e.g.  
323 | peanut), cultivar selection, adjusting sowing windows (Liu et al., 2013; Lu et al., 2017)  
324 | and ridge-furrow with plastic film, (Dong et al., 2017) are more applicable in  
325 | optimizing crop yield and regional sustainability. Our study provides more evidences

删除的内容: In rain-fed maize production in a region with frequent drought, to optimizing maize yield, the agronomic managements, e.g.

删除的内容: and

删除的内容: cultivation

删除的内容: could be

删除的内容: ed

删除的内容: interesting

326 to understand crop responses to water stress, especially in relation to root  
327 morphological plasticity in a drought environment. The results can be further applied  
328 combining with crop model (Mao et al., 2015) to mitigate climate risk in dry land  
329 agriculture.

删除的内容: on r

删除的内容: could

删除的内容: climate

删除的内容: (e.g. drought)

删除的内容: globally

330

### 331 **Author contribution**

332 Z. Sun, Y. Zhang, J. Zheng and Q. Cai conceived and designed the experiments.

333 Q. Cai, W. Bai, [Y Zhang](#), Y. Liu, L. Feng, C. Feng, Z. Zhang and N. Yang performed  
334 the experiments. L. Zhang, Q. Cai and J.B. Evers analyzed the data and wrote the  
335 paper.

336

### 337 **Competing interests**

338 The authors declare that they have no conflict of interest.

339

### 340 **Special issue statement**

341 Special issue: Ecosystem processes and functioning across current and future  
342 dryness gradients in arid and semi-arid lands.

343

### 344 **Acknowledgements**

345 This research was supported by the National key research and development  
346 program of China (2016YFD0300204), the International Cooperation and Exchange  
347 (31461143025) and the Youth Fund (31501269) of the National Science Foundation  
348 of China, Liaoning BaiQianWan Talent Program (201746), Outstanding Young  
349 Scholars of National High-level Talent Special Support Program of China.

350

351 **References**

352 Abendroth, L.J., Elmore, R.W., Boyer, M.J., Marlay, S.K., 2011. Corn Growth and  
353 Development. PMR 1009. Iowa State University Extension, Ames, Iowa, USA.

354 <https://store.extension.iastate.edu/Product/Corn-Growth-and-Development>

355 [\(accessed in 8 June 2017\)](#).

删除的内容: www.extension.iastate.edu/documents/test/PMR1009corn0405.html

356 Beis, A., Patakas, A., 2015. Differential physiological and biochemical responses to  
357 drought in grapevines subjected to partial root drying and deficit irrigation. *Eur.*  
358 *J. Agron.* 62, 90-97.

359 Cakir, R., 2004. Effect of water stress at different development stages on vegetative  
360 and reproductive growth of corn. *Field Crop Res.* 89, 1-16.

361 Claassen, M.M., Shaw, R.H., 1970. Water deficit effects on corn. II. Grain  
362 components. *Agron. J.* 62, 652-655.

363 Davies, W.J., Zhang, J., 1991. Root signals and the regulation of growth and  
364 development of plants in drying soil. *Ann. Rev. Plant Physiol. Plant Mol. Biol.*  
365 42, 55-76.

366 Dodd, I.C., 2009. Rhizosphere manipulations to maximize crop per drop during deficit  
367 irrigation. *J. Exp. Bot.* 60, 2454-2459.

368 Dong, W., Zhang, L., Duan, Y., Sun, L., Zhao, P., van der Werf, W., Evers, J.B., Wang,  
369 Q., Wang, R., Sun, Z., 2017. Ridge and furrow systems with film cover  
370 increase maize yields and mitigate climate risks of cold and drought stress in  
371 continental climates. *Field Crops Res.* Doi:10.1016/j.fcr.2017.03.003.

372 Doorenbos, J., Kassam, A.H., Bentvelsen, C., Uittenbogaard, G., 1979. Yield response  
373 to water. *FAO Irrigation and Drainage Paper No. 33*, FAO, Rome, Italy. pp.193.

删除的内容: pp.

374 Ennahli, S., Earl, H.J., 2005. Physiological limitations to photosynthetic carbon  
375 assimilation in cotton under water stress. *Crop Sci.* 45, 2374-2382.



376 Gavloski, J.E., Whitfield, G.H., Ellis, C.R., 1992. Effect of restricted watering on sap  
377 flow and growth in corn (*Zea mays* L.). Can. J. Plant Sci. 72, 361-368.

378 Ge, T., Sui, F., Bai, L., Tong, C. and Sun, N., 2012. Effects of water stress on growth,  
379 biomass partitioning, and water-use efficiency in summer maize (*Zea mays* L.)  
380 throughout the growth cycle. Acta Physiol. Plant. 34(3), 1043-1053.

381 Haworth, M., Cosentino, S.L., Marino, G., Brunetti, C., Scordia, D., Testa, G., Riggi,  
382 E., Avola, G., Loreto, F., Centritto, M., 2016. Physiological responses of  
383 *Arundo donax* ecotypes to drought: a common garden study. Glob. Change Biol.  
384 Bioenergy. Doi:10.1111/gcbb.12348.

385 IPCC Climate change, 2007. The physical science basis. In: Solomon, S., Qin, D.,  
386 Manning, M., Chen, Z., Marquis, M., Averyt, K.B., Tignor, M., Miller, H.L.,  
387 (Eds). Contribution of working group I to the fourth assessment report of the  
388 intergovernmental panel on climate change. Cambridge University Press,  
389 Cambridge, pp. 996.

390 Jupp, A.P., Newman, E.I., 1987. Morphological and anatomical effects of severe  
391 drought on the roots of *Lolium perenne* L. New Phytol. 105, 393-402.

392 Kang, S.Z., Shi, W.J , Zhang, J.H, 2000. An improved water-use efficiency for maize  
393 grown under regulated deficit irrigation. Field Crops Res. 67, 207-214

394 Kang, S.Z., Zhang, L., Liang, Y.L., Hu, X.T., Cai, H.J., Gu, B.J., 2002. Effects of  
395 limited irrigation on yield and water use efficiency of winter wheat in the Loess  
396 Plateau of China. Agric. Water Manage. 55, 203-216.

397 Killi, D., Bussotti, F., Raschi A., Haworth, M., 2017. Adaptation to high temperature  
398 mitigates the impact of water deficit during combined heat and drought stress in  
399 C3 sunflower and C4 maize varieties with contrasting drought tolerance.  
400 Physiol. Plant. 159, 130-147.

删除的内容:

- 401 Lake, L., Sadras, V.O., 2016. Screening chickpea for adaptation to water stress:  
402 Associations between yield and crop growth rate. *Eur. J. Agron.* 81, 86-91.
- 403 Liu, E.K., Mei, X.R., Yan, C.R., Gong, D.Z., Zhang, Y.Q., 2016. Effects of water  
404 stress on photosynthetic characteristics, dry matter translocation and WUE in  
405 two winter wheat genotypes. *Agric. Water Manage.* 167, 75-85.
- 406 Liu, F., Jensen, C.R., Andersen, M.N., 2005. A review of drought adaptation in crop  
407 plants: changes in vegetative and reproductive physiology induced by  
408 ABA-based chemical signals. *Australian J. Agric. Res.* 56(11), 1245-1252.
- 409 [Liu, Z.J., Hubbard, K.G., Lin, X.M., Yang, X.G., 2013. Negative effects of climate](#)  
410 [warming on maize yield are reversed by the changing of sowing date and](#)  
411 [cultivar selection in Northeast China. \*Glob. Chang. Biol.\* 19, 3481-3492.](#)
- 412 Liu, Z.J., Yang, X.G., Hubbard, K.G., Lin, X.M., 2012. Maize potential yields and  
413 yield gaps in the changing climate of northeast China. *Glob. Chang. Biol.* 18,  
414 3441-3454.
- 415 ~~Lu, H., Xue, J., Guo, D., 2017. Efficacy of planting date adjustment as a cultivation~~  
416 ~~strategy to cope with drought stress and increase rainfed maize yield and~~  
417 ~~water-use efficiency. *Agric. Water Manage.* 179, 227-235.~~
- 418 Lynch, J.P., 1995. Root architecture and plant productivity. *Plant Physiol.* 109, 7-13.
- 419 Mao, L., Zhang, L., Evers, J. B., van der Werf, W., Wang, J., Sun, H., Su, Z., Spiertz,  
420 H., 2015. Resource use, sustainability and ecological intensification of  
421 intercropping systems. *J. Integr. Agr.* 14(8), 1442-1550.
- 422 McIntyre, B.D., Riha, S.J., Flower, D.J., 1995. Water uptake by pearl millet in a  
423 semiarid environment. *Field Crops Res.* 43, 67-76
- 424 Monteith, J.L., 1981. Coupling of plants to the atmosphere. In: Grace, J., Ford, E.D.,  
425 Jarvis, P.G., (Eds.). *Plants and their Atmospheric Environment.* Blackwell,

删除的内容: Liu, Z.J., Hubbard, K.G., Lin, X.M., Yang, X.G., 2013. Negative effects of climate warming on maize yield are reversed by the changing of sowing date and cultivar selection in Northeast China. *Glob. Chang. Biol.* 19, 3481-3492.

删除的内容:

- 426 Oxford, pp. 1-29.
- 427 Muller, F., Rieu, I., 2016. Acclimation to high temperature during pollen development.  
428 Plant Reprod. 29(102), 107-118.
- 429 NeSmith, D.S., Ritchie, J.T., 1992. Short- and long-term responses of corn to  
430 pre-anthesis soil water deficit. Agron. J. 84, 107-113.
- 431 Payero, J.O., Melvin, S.R., Irmak, S., Tarkalson, D., 2006. Yield response of corn to  
432 deficit irrigation in a semiarid climate. Agric. Water Manage. 84, 101-112.
- 433 Qiu, G.Y., Wang, L.M., He, X.H., Zhang, X.Y., Chen, S.Y., Chen, J., Yang, Y.H., 2008.  
434 Water use efficiency and evapotranspiration of winter wheat and its response to  
435 irrigation regime in the north China plain. Agric. For. Meteorol.  
436 148,1848-1859.
- 437 Rampino, P., Pataleo, S., Gerardi, C., Mita, G., Perrotta, C., 2006. Drought stress  
438 response in wheat: physiological and molecular analysis of resistant and  
439 sensitive genotypes. Plant Cell Environ. 29, 2143-2152.
- 440 Richards, A., 2000. Selectable traits to increase crop photosynthesis and yield of grain  
441 crops. J. Exp. Bot. 51, 447-458.
- 442 Song, X.Y., Li, L.J., Fu, G.B., Li, J.Y., Zhang, A.J., Liu, W.B., Zhang, K., 2014.  
443 Spatial-temporal variations of spring drought based on spring-composite index  
444 values for the Songnen Plain, Northeast China. Theor. Appl. Climatol. 116,  
445 371-384.
- 446 Traore, S.B., Carlson, R.E., Pilcher, C.D., Rice, M.E., 2000. Bt and Non-Bt maize  
447 growth and development as affected by temperature and drought stress. Agron.  
448 J. 92, 1027-1035.
- 449 Xue, Q.W., Zhu, Z.X., Musick, J.T., Stewart, B.A., Dusek, D.A., 2006. Physiological  
450 mechanisms contributing to the increased water-use efficiency in winter wheat

451 under deficit irrigation. *J. Plant Physiol.* 163, 154-164.

452 Yu, X.Y., He, X.Y., Zheng, H.F., Guo, R.C., Ren, Z.B., Zhang, D., Lin, J.X., 2014.

453 Spatial and temporal analysis of drought risk during the crop-growing season

454 over northeast China. *Nat. Hazards* 71, 275-289.

455 Zhang, J., Davies, W.J., 1989. Abscisic acid produced in dehydrating roots may enable

456 the plant to measure the water status of the soil. *Plant Cell Environ.* 12, 73-81.

457 Zhang, J., Sun, J.S., Duan, A., Wang, J.L., Shen, X.J., Liu, X.F., 2007. Effects of

458 different planting patterns on water use and yield performance of winter wheat

459 in the Huang-Huai-Hai plain of China. *Agric. Water Manage.* 92, 41-47.

460 [Zhang, X., Qin, W., Chen, S., Shao, L., Sun, H., 2017. Responses of yield and](#)

461 [WUE of winter wheat to water stress during the past three decades—A case](#)

462 [study in the North China Plain. \*Agric. Water Mange.\* 179, 47-54.](#)

463 Zhang, X., Wang, Y., Sun, H., Chen, S., Shao, L., 2013. Optimizing the yield of winter

464 wheat by regulating water consumption during vegetative and reproductive

465 stages under limited water supply. *Irrig. Sci.* 31, 1103-1112.

删除的内容: Zhang, X., Qin, W., Chen, S., Shao, L., Sun, H., 2017. Responses of yield and WUE of winter wheat to water stress during the past three decades—A case study in the North China Plain. *Agric. Water Mange.* 179, 47-54.

删除的内容:

466 **Table 1** Water treatments during crop growing seasons in 2014 to 2015.

| Year | Water treatment | Initial volumetric soil moisture content (%) | Actual water supply at three growing periods (mm) |                     |                    | Total |
|------|-----------------|----------------------------------------------|---------------------------------------------------|---------------------|--------------------|-------|
|      |                 |                                              | Early (16-29 DAS <sup>1</sup> )                   | Middle (30-102 DAS) | Late (103-121 DAS) |       |
| 2014 | No stress       | 24.4                                         | 11.9                                              | 478                 | 56                 | 545   |
|      | Mild stress     | 24.8                                         | 11.9                                              | 299                 | 56                 | 366   |
|      | Severe stress   | 24.9                                         | 11.9                                              | 122                 | 56                 | 190   |
| 2015 | No stress       | 25.3                                         | 11.9                                              | 510                 | 32                 | 553   |
|      | Mild stress     | 25.3                                         | 11.9                                              | 334                 | 32                 | 378   |
|      | Severe stress   | 24.4                                         | 11.9                                              | 159                 | 32                 | 203   |

<sup>1</sup>DAS refers days after maize sowing.

467

468 **Table 2** Yield and yield components affected by different water stresses in 2014 to  
 469 2015

| Year     | Water treatment | Ear number               | Kernel number             | Thousand kernel weight | Yield per plant       | Harvest index     |
|----------|-----------------|--------------------------|---------------------------|------------------------|-----------------------|-------------------|
|          |                 | ears plant <sup>-1</sup> | kernels ear <sup>-1</sup> | g                      | g plant <sup>-1</sup> | g g <sup>-1</sup> |
| 2014     | No stress       | 2.0±0.0a                 | 354±32a                   | 440±6.8a               | 301±33a               | 0.36±0.01a        |
|          | Mild stress     | 2.0±0.0a                 | 350±16a                   | 416±1.2b               | 276±14a               | 0.37±0.01a        |
|          | Severe stress   | 2.0±0.0a                 | 245±35b                   | 412±3.7b               | 166±25b               | 0.27±0.02b        |
| 2015     | No stress       | 2.0±0.0a                 | 341±67a                   | 426±12a                | 240±60a               | 0.29±0.04a        |
|          | Mild stress     | 2.0±0.0a                 | 244±53a                   | 427±22a                | 168±42ab              | 0.25±0.03a        |
|          | Severe stress   | 1.3±0.3b                 | 172±46a                   | 412±16a                | 81±22b                | 0.17±0.04a        |
| mean     | No stress       | 2.0±0.2a                 | 347±38a                   | 432±7.5a               | 266±36a               | 0.32±0.03a        |
|          | Mild stress     | 2.0±0.0a                 | 289±36ab                  | 422±12a                | 214±32a               | 0.30±0.03ab       |
|          | Severe stress   | 1.6±0.0b                 | 203±31b                   | 412±8.5a               | 118±23b               | 0.21±0.03b        |
| <i>P</i> | Treatment       | 0.021                    | 0.003                     | 0.556                  | 0.005                 | 0.013             |
|          | Year            | 0.184                    | 0.514                     | 0.889                  | 0.237                 | 0.039             |
|          | Treat×Year      | 0.111                    | 0.664                     | 0.555                  | 0.835                 | 0.758             |

Same small letters indicate no significant difference between water treatment within same year at  $\alpha=0.05$ .

470  
 471

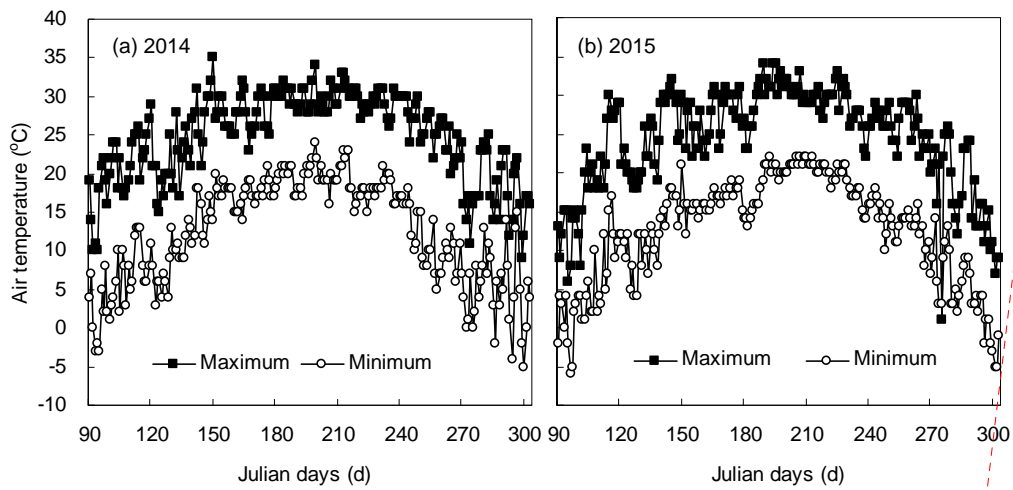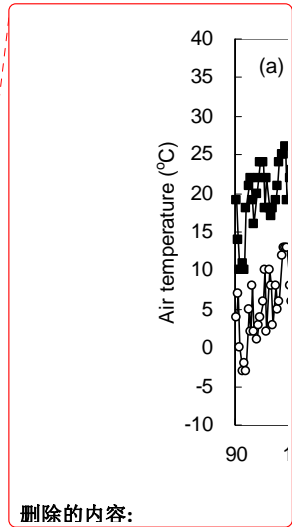

删除的内容:

472

473 **Fig. 1** Daily maximum and minimum air temperatures in 2014 and 2015 in

474 Shenyang, Liaoning, China

475

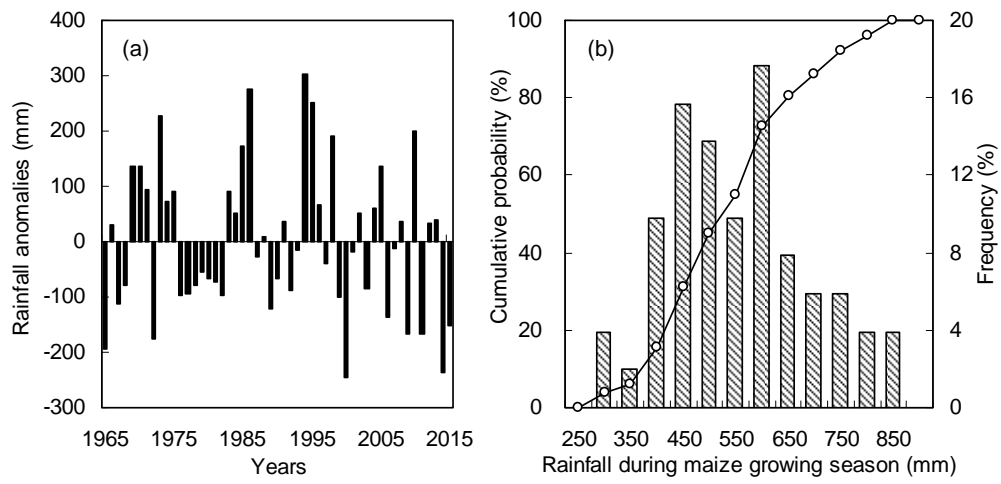

476

477 **Fig. 2 Anomalies and cumulative frequency of rainfall during maize growing season**

478 **(May to September) from 1965 to 2015 at Shengyang, Liaoning.**



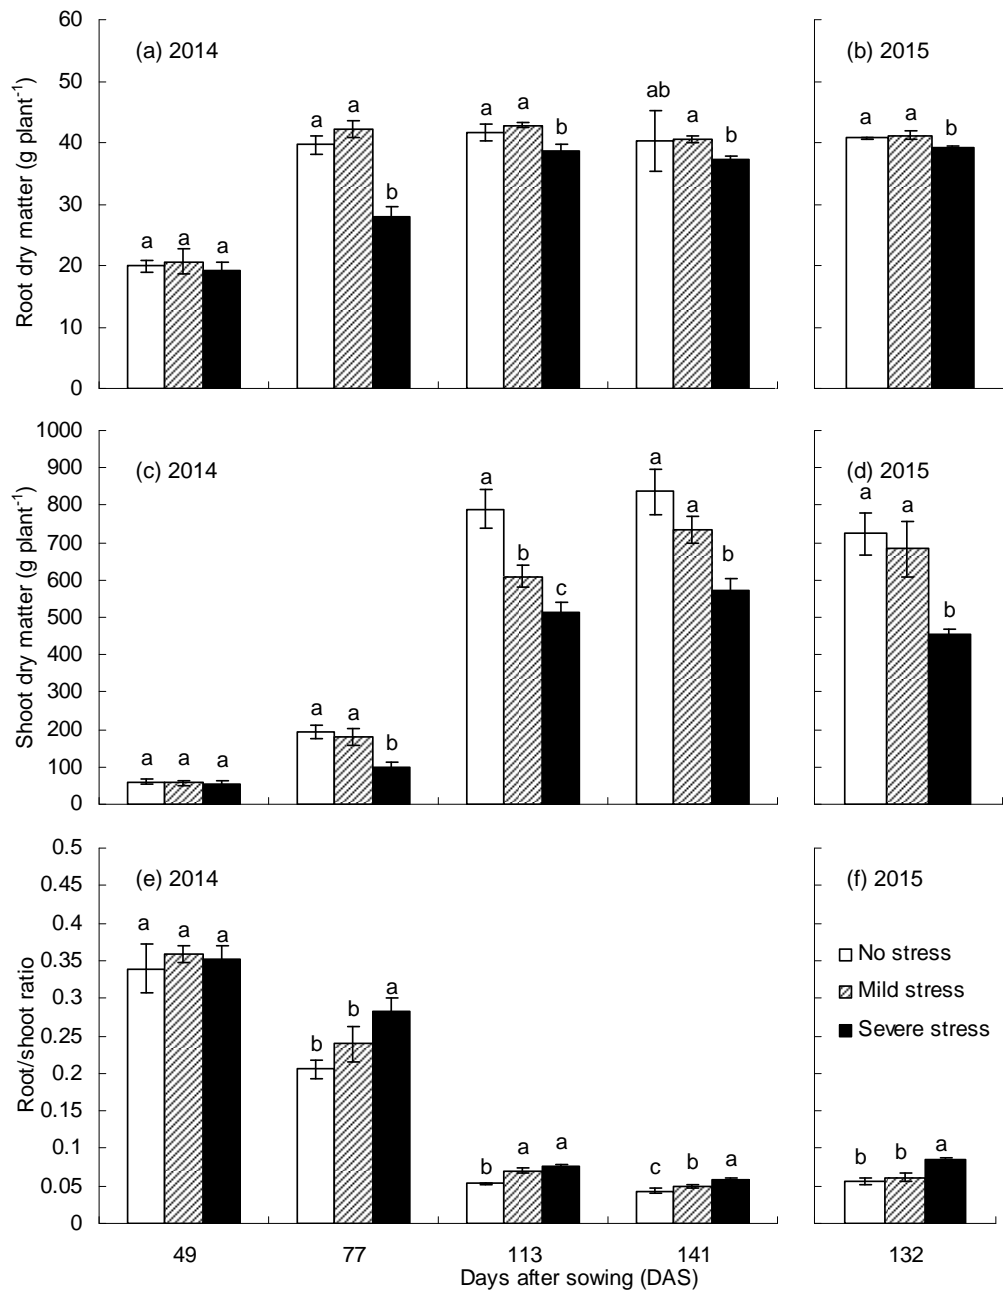

479

480 **Fig. 3** Root and shoot dry matters of maize under water stress at different growing  
 481 periods in 2014-2015.

删除的内容: 2

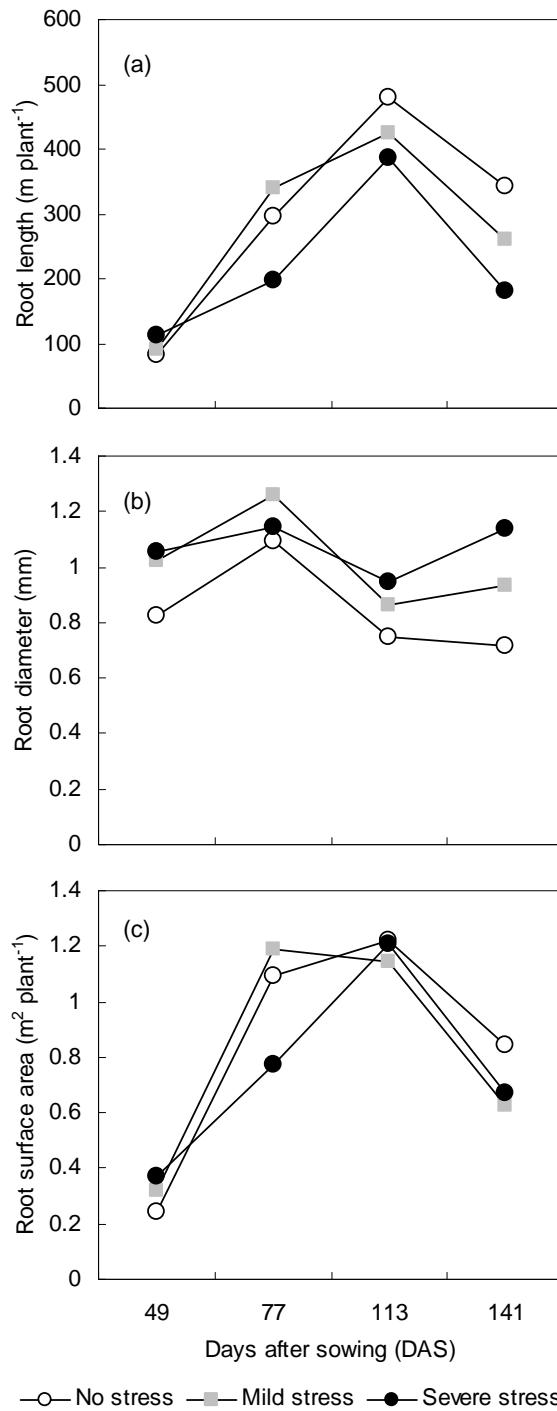

482

483 **Fig. 4** Total root length, average diameter and total surface area per plant affected by

484 water stress in 2014

删除的内容: 3

删除的内容: -2015

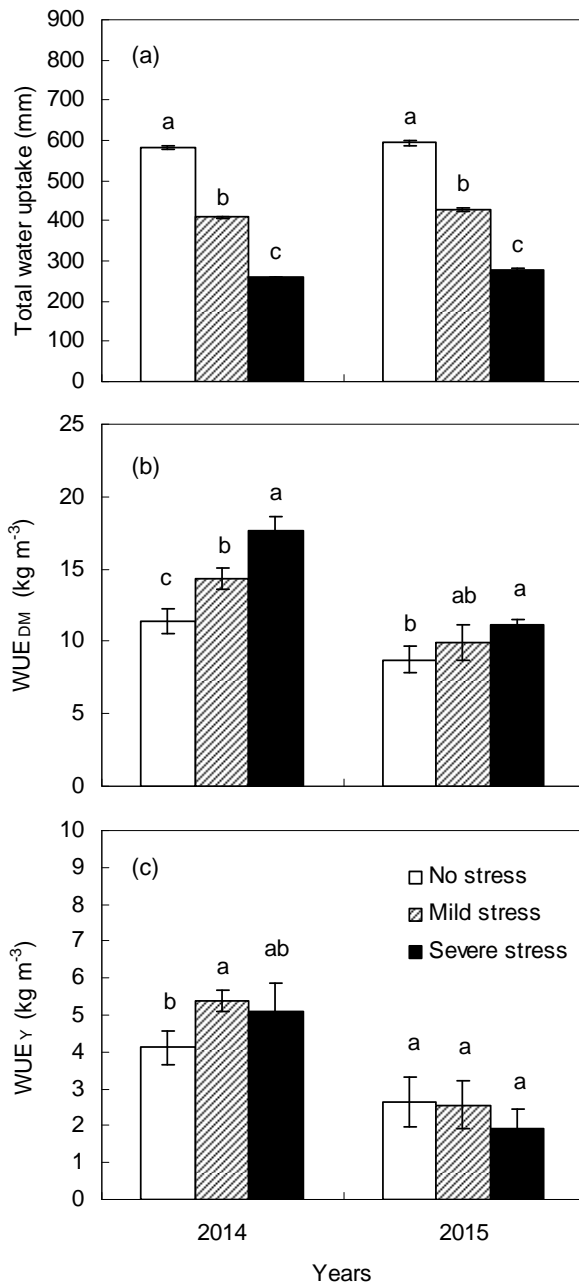

485

486 **Fig. 5** Total water uptake (WU) during crop growing season and water use efficiency  
 487 for above-ground dry matter (WUE<sub>DM</sub>) and grain yield (WUE<sub>Y</sub>) under water stress in  
 488 2014-2015

489

删除的内容: 4
